# Supplementary material for: Enteric tuft cells coordinate timely expulsion of the tapeworm Hymenolepis diminuta from the murine host by coordinating local but not systemic immunity
Source: PubMed Central journal article supplement (PMC11290655; doi:10.1371/journal.ppat.1012381), 2024-07-31

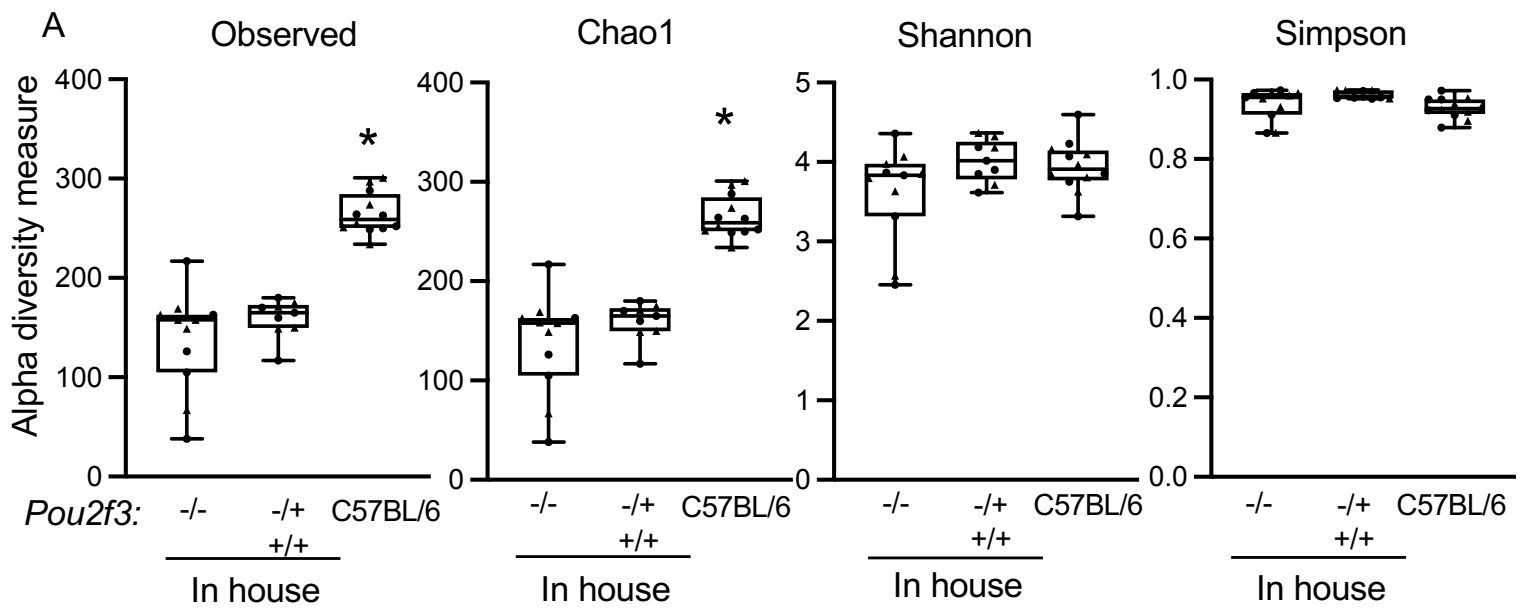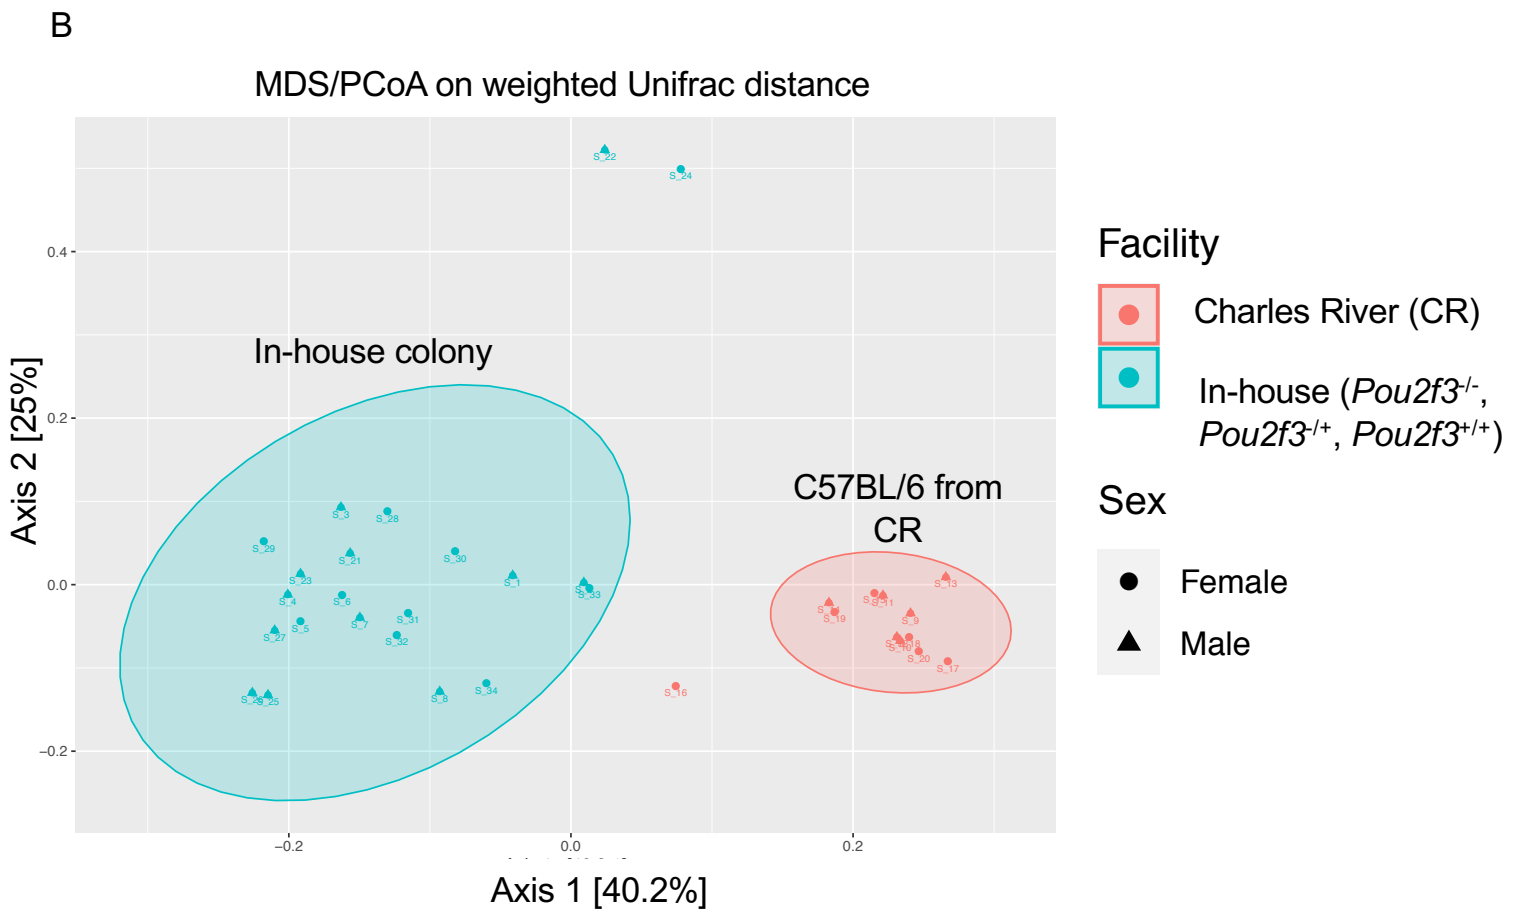

Supplement: ppat.1012381.s006.pdf [file ppat.1012381.s006.pdf]
