# Supplementary material for: Enteric tuft cells coordinate timely expulsion of the tapeworm Hymenolepis diminuta from the murine host by coordinating local but not systemic immunity
Source: PubMed Central journal article supplement (PMC11290655; doi:10.1371/journal.ppat.1012381), 2024-07-31
Supplement: ppat.1012381.s012.pdf [file ppat.1012381.s012.pdf]

S1 Table. Comparison of uninfected control and *H. diminuta*-infected C57BL/6 wild-type and *Pou2f3*<sup>-/-</sup> littermates. Data are mean ± SEM; dpi, days post-infection; *H. diminuta* at 5 cysticercoids by oral gavage; multiple unpaired T tests with Welch's correction and Hom Sidak test.

|                                                                        | WT <i>Pou2f3</i> <sup>+/-</sup> and +/+ | <i>Pou2f3</i> <sup>-/-</sup> |
|------------------------------------------------------------------------|-----------------------------------------|------------------------------|
| <u>Serum IgG1 (µg/mL)</u>                                              |                                         |                              |
| Control (n=4-5)                                                        | 2.6 ± 0.4                               | 1.4 ± 0.3                    |
| <i>H. diminuta</i> 8 dpi (n=7)                                         | 2.5 ± 0.8                               | 3.0 ± 0.5                    |
| <u>Serum IgG2α (µg/mL)</u>                                             |                                         |                              |
| Control (n=4-5)                                                        | 3.1 ± 0.9                               | 4.6 ± 3.1                    |
| <i>H. diminuta</i> 8 dpi (n=9)                                         | 1.1 ± 0.3                               | 2.7 ± 1.4                    |
| <u>Colonic motility (time to expel 3 mm bead (seconds))</u>            |                                         |                              |
| Control (n=3-6)                                                        | 86 ± 16                                 | 64 ± 6                       |
| <i>H. diminuta</i> 8 dpi (n=3)                                         | 105 ± 8                                 | 116 ± 19                     |
| <u>Ussing chamber analysis</u>                                         |                                         |                              |
| Baseline short circuit current (I <sub>sc</sub> , µA/cm <sup>2</sup> ) |                                         |                              |
| Control (n=3-5)                                                        | 66 ± 30                                 | 74 ± 18                      |
| <i>H. diminuta</i> 8 dpi (n=3-4)                                       | 68 ± 12                                 | 54 ± 10                      |
| Carbachol (100 µM) (ΔI <sub>sc</sub> µA/cm <sup>2</sup> )              |                                         |                              |
| Control (n=3-5)                                                        | 68 ± 6.5                                | 65 ± 14                      |
| <i>H. diminuta</i> 8 dpi (n=3-4)                                       | 37 ± 4                                  | 103 ± 23                     |
| Forskolin (10 µM) (ΔI <sub>sc</sub> µA/cm <sup>2</sup> )               |                                         |                              |
| Control (n=3-5)                                                        | 84 ± 10                                 | 93 ± 5                       |
| <i>H. diminuta</i> 8 dpi (n=3-4)                                       | 70 ± 9                                  | 88 ± 25                      |
