# Supplementary material for: Enteric tuft cells coordinate timely expulsion of the tapeworm Hymenolepis diminuta from the murine host by coordinating local but not systemic immunity
Source: PubMed Central journal article supplement (PMC11290655; doi:10.1371/journal.ppat.1012381), 2024-07-31
Supplement: ppat.1012381.s013.pdf [file ppat.1012381.s013.pdf]

S2 Table. Immunophenotyping of uninfected and *H. diminuta*-infected wild-type (WT; *Pou2f3*<sup>+/+</sup> and *Pou2f3*<sup>+/-</sup>) and tuft cell-deficient *Pou2f3*<sup>-/-</sup> C57BL/6 mice. Data are Mean ± SEM, \* *p* < 0.05, analysed by Two Way ANOVA and Dunnett's post test compared to uninfected controls.

| Region                                                           | Cell type (number of cells)                                      | Genotype                     | Control (n=7-10) | 5 dpi. (n=5) | 8 dpi. (n=6) | 11 dpi. (n=9-10) |
|------------------------------------------------------------------|------------------------------------------------------------------|------------------------------|------------------|--------------|--------------|------------------|
| MLN                                                              | B cells (CD19 <sup>+</sup> ) (x 10 <sup>6</sup> )                | WT                           | 1.7±0.5          | 0.9±0.4      | 2.5±0.6      | 3.5±1            |
|                                                                  |                                                                  | <i>Pou2f3</i> <sup>-/-</sup> | 0.9±0.2          | 0.8±0.3      | 2.5±0.8      | 4.9±1.5*         |
|                                                                  | Cytotoxic T cells (CD8 <sup>+</sup> ) (x 10 <sup>5</sup> )       | WT                           | 8.9±1.9          | 5.9±1.9      | 15.8±3.6     | 22.1±5.9*        |
|                                                                  |                                                                  | <i>Pou2f3</i> <sup>-/-</sup> | 7±1.6            | 9.3±3.4      | 13.2±4       | 24.9±6.1*        |
|                                                                  | T helper cells (CD4 <sup>+</sup> ) (x 10 <sup>6</sup> )          | WT                           | 1.4±0.3          | 0.7±0.3      | 2.3±0.5      | 3.3±0.8*         |
|                                                                  |                                                                  | <i>Pou2f3</i> <sup>-/-</sup> | 0.9±0.2          | 1.2±0.5      | 1.6±0.5      | 3±0.7*           |
| Tbet <sup>+</sup> CD4 <sup>+</sup> T cells (x 10 <sup>4</sup> )  | WT                                                               | 1.5±0.4                      | 1.6±0.9          | 1.9±0.6      | 5±0.8*       |                  |
|                                                                  | <i>Pou2f3</i> <sup>-/-</sup>                                     | 1±0.2                        | 1.1±0.4          | 1.7±0.6      | 5.4±2*       |                  |
| RORγT <sup>+</sup> CD4 <sup>+</sup> T cells (x 10 <sup>3</sup> ) | WT                                                               | 5.9±1.7                      | 6.1±2            | 8.8±3.9      | 12.7±2.9     |                  |
|                                                                  | <i>Pou2f3</i> <sup>-/-</sup>                                     | 3.7±1.2                      | 11.2±4.4         | 7.7±2.1      | 9.3±2.7      |                  |
| Peyer's patches                                                  | B cells (CD19 <sup>+</sup> ) (x 10 <sup>6</sup> )                | WT                           | 2.8±0.5          | 0.9±0.3*     | 1.8±0.4      | 2.3±0.3          |
|                                                                  |                                                                  | <i>Pou2f3</i> <sup>-/-</sup> | 2.9±0.5          | 1.1±0.5*     | 2.4±0.8      | 2.3±0.4          |
|                                                                  | Cytotoxic T cells (CD8 <sup>+</sup> ) (x 10 <sup>5</sup> )       | WT                           | 1.3±0.3          | 0.5±0.2      | 0.9±0.3      | 1.1±0.2          |
|                                                                  |                                                                  | <i>Pou2f3</i> <sup>-/-</sup> | 1.2±0.2          | 0.5±0.2      | 1.2±0.4      | 1.5±0.4          |
|                                                                  | T helper cells (CD4 <sup>+</sup> ) (x 10 <sup>6</sup> )          | WT                           | 0.4±0.1          | 0.2±0.1*     | 0.3±0.1      | 0.4±0.1          |
|                                                                  |                                                                  | <i>Pou2f3</i> <sup>-/-</sup> | 0.4±0.1          | 0.2±0.1      | 0.4±0.1      | 0.4±0.1          |
| Tbet <sup>+</sup> CD4 <sup>+</sup> T cells (x 10 <sup>4</sup> )  | WT                                                               | 0.5±0.2                      | 0.2±0.2          | 0.3±0.2      | 0.7±0.2      |                  |
|                                                                  | <i>Pou2f3</i> <sup>-/-</sup>                                     | 0.6±0.2                      | 0.8±0.4          | 0.9±0.4      | 0.7±0.3      |                  |
| RORγT <sup>+</sup> CD4 <sup>+</sup> T cells (x 10 <sup>3</sup> ) | WT                                                               | 5.2±1.5                      | 1.4±0.5          | 2.9±1.3      | 4.5±0.8*     |                  |
|                                                                  | <i>Pou2f3</i> <sup>-/-</sup>                                     | 4.3±0.7                      | 1.9±0.8          | 3.9±0.8      | 1.7±0.5      |                  |
| Spleen                                                           | B cells (CD19 <sup>+</sup> ) (x 10 <sup>6</sup> )                | WT                           | 44.6±5.7         | 30.4±6.1     | 38.3±6.8     | 50.2±8.7         |
|                                                                  |                                                                  | <i>Pou2f3</i> <sup>-/-</sup> | 40.5±5.8         | 26±5.2       | 26±5.2       | 37.8±2.5         |
|                                                                  | Cytotoxic T cells (CD8 <sup>+</sup> ) (x 10 <sup>5</sup> )       | WT                           | 76.5±7.5         | 65.9±14.1    | 89.8±16.7    | 112.9±19.2       |
|                                                                  |                                                                  | <i>Pou2f3</i> <sup>-/-</sup> | 114.4±27.8       | 52±9.9       | 52±9.9       | 85.9±7.2         |
|                                                                  | T helper cells (CD4 <sup>+</sup> ) (x 10 <sup>6</sup> )          | WT                           | 12.7±1.3         | 10±2.2       | 14.3±3.3     | 19.4±3.6         |
|                                                                  |                                                                  | <i>Pou2f3</i> <sup>-/-</sup> | 13.4±2.2         | 7±1.6        | 7±1.6        | 12.4±2           |
|                                                                  | Gata3 <sup>+</sup> CD4 <sup>+</sup> T cells (x 10 <sup>4</sup> ) | WT                           | 1.6±0.4          | 0.9±0.4      | 5.4±1.6      | 2.8±0.5          |
|                                                                  |                                                                  | <i>Pou2f3</i> <sup>-/-</sup> | 2.1±0.6          | 0.8±0.3      | 0.8±0.3      | 0.9±0.4          |
| Foxp3 <sup>+</sup> CD4 <sup>+</sup> T cells (x 10 <sup>5</sup> ) | WT                                                               | 17.4±2.1                     | 12.9±3           | 17.2±3.8     | 23.5±3.9     |                  |
|                                                                  | <i>Pou2f3</i> <sup>-/-</sup>                                     | 18.5±4.8                     | 8.8±2            | 8.8±2        | 13.6±2.3     |                  |
| Tbet <sup>+</sup> CD4 <sup>+</sup> T cells (x 10 <sup>4</sup> )  | WT                                                               | 18.5±8.6                     | 17.6±4.6         | 21.6±2.8     | 16.4±4.4     |                  |
|                                                                  | <i>Pou2f3</i> <sup>-/-</sup>                                     | 22.3±5.2                     | 6.3±1.3          | 6.3±1.3      | 10±1.7       |                  |
| RORγT <sup>+</sup> CD4 <sup>+</sup> T cells (x 10 <sup>3</sup> ) | WT                                                               | 10.2±3.7                     | 18.2±8.6         | 13.1±4.7     | 10.7±3.9     |                  |
|                                                                  | <i>Pou2f3</i> <sup>-/-</sup>                                     | 17.7±5.3                     | 12.8±6           | 12.8±6       | 5.7±1.8      |                  |
