# Supplementary material for: Enteric tuft cells coordinate timely expulsion of the tapeworm Hymenolepis diminuta from the murine host by coordinating local but not systemic immunity
Source: PubMed Central journal article supplement (PMC11290655; doi:10.1371/journal.ppat.1012381), 2024-07-31
Supplement: ppat.1012381.s014.pdf [file ppat.1012381.s014.pdf]

S3 Table. Primers used for genotyping or RT-PCR on murine cells

| Gene target                                            | Forward primer                                         | Reverse primer              |
|--------------------------------------------------------|--------------------------------------------------------|-----------------------------|
| WT_ <i>Pou2f3</i> /KO_ <i>Pou2f3</i> _ LacZ genotyping | ggagaagtcggctcctctcccattatc/<br>gcattctagttgtggtttgtcc | cagtcaatagctggggagctgaagctc |
| <i>18S</i>                                             | atggccggttcttagttggtg                                  | cgctgagccagtcagtgtag        |
| <i>Dclk1</i>                                           | actaaggacagggcacagac                                   | tgaccggggaaagcagtaat        |
| <i>Il-25</i>                                           | tggcttagtcatgctcacca                                   | gtttctccccaagtcctcca        |
| <i>Alox5</i>                                           | ggcccgagatgaccaaattc                                   | aactggatatctcggggcag        |
| <i>Trpm5</i>                                           | gacatggccgagttcttgac                                   | aagtctttgagtacgcggga        |
