# Supplementary material for: Enteric tuft cells coordinate timely expulsion of the tapeworm Hymenolepis diminuta from the murine host by coordinating local but not systemic immunity
Source: PubMed Central journal article supplement (PMC11290655; doi:10.1371/journal.ppat.1012381), 2024-07-31
Supplement: ppat.1012381.s015.pdf [file ppat.1012381.s015.pdf]

S4 Table. List of antibodies used for flow cytometry and immunohistochemistry

| <b>Flow cytometry</b>                                  |                             |                         |                            |
|--------------------------------------------------------|-----------------------------|-------------------------|----------------------------|
| Antibody target- Fluorescent marker                    | Clone                       | Company                 | Working concentration      |
| CD16/32                                                | 93                          | Biolegend               | 1 µg/10 <sup>6</sup> cells |
| CD4-BV786                                              | RM4-5                       | BD Biosciences          | 1 µg/mL                    |
| CD19-PE-Cy7                                            | 6D5                         | Biolegend               | 1 µg/mL                    |
| CD45-APC-Cy7                                           | 30-F11                      | Biolegend               | 1 µg/mL                    |
| CD3-AF700                                              | 145-2C11                    | Biolegend               | 2.5 µg/mL                  |
| CD8α-APC                                               | 53-6.7                      | Biolegend               | 1 µg/mL                    |
| T-bet-BV421                                            | O4-46                       | BD Biosciences          | 2 µg/mL                    |
| FoxP3-FITC                                             | FJK-16s                     | eBioscience             | 2.5 µg/mL                  |
| RORγt-PE                                               | B2D                         | eBioscience             | 2 µg/mL                    |
| RORγt-APC                                              | B2D                         | eBioscience             | 2 µg/mL                    |
| GATA3-PE                                               | TWAJ                        | eBioscience             | 0.1 µg/mL                  |
| GATA3-PerCP-Cy5.5                                      | 16E10A23                    | Biolegend               | 0.1 µg/mL                  |
| CD90.2-BV421                                           | 53-2.1                      | eBioscience             | 0.25 µg/mL                 |
| <b>Lineage markers (ILC gating)</b>                    |                             |                         |                            |
| Ly6G-FITC                                              | 1A8                         | eBioscience             | 5 µg/mL                    |
| B220-FITC                                              | RA3-6B2                     | eBioscience             | 5 µg/mL                    |
| NK1.1-FITC                                             | PK136                       | eBioscience             | 5 µg/mL                    |
| CD3-FITC                                               | 17A2                        | eBioscience             | 5 µg/mL                    |
| CD8-FITC                                               | 53-6.7                      | eBioscience             | 5 µg/mL                    |
| <b>Immunohistochemistry</b>                            |                             |                         |                            |
| Primary antibody target, host species it was raised in | Clone/ (#) catalogue number | Company                 | Concentration              |
| DCLK1, rabbit                                          | # ab31704                   | Abcam                   | 1 µg/mL                    |
| SiglecF, rat                                           | S17007L                     | Biolegend               | 2.5 µg/mL                  |
| IL-5Rα, rabbit                                         | #BS-2601R                   | ThermoFisher Scientific | 10 µg/mL                   |
| Secondary antibody - fluorescent marker                | Clone/ (#) catalogue number | Company                 | Concentration              |
| Donkey anti-rabbit IgG-Cy3                             | #711-165-152                | Jackson ImmunoResearch  | 3 µg/mL                    |
| Donkey anti-rat IgG-Cy5                                | #712-175-153                | Jackson ImmunoResearch  | 3 µg/mL                    |
